# Supplementary material for: Simulated operant reflex conditioning environment reveals effects of feedback parameters
Source: PubMed Central journal article supplement (PMC10956789; doi:10.1371/journal.pone.0300338), 2024-03-21
Supplement: pone.0300338.s001.pdf [file pone.0300338.s001.pdf]

## Supporting Information

**S1 Table. Effect of biological variability and feedback type on performance and operant strategy (moderate threshold).** Values represent overall mean  $\pm$  SE. Tukey HSD was used for pair-wise comparisons ( $\leftrightarrow$ ) between conditions of high and low variability (*HV*, *LV*) and different feedback types (*Kp*, *Kr*, *KpKr*).

Statistical significance (\*  $p < 0.05$ , \*\*  $p < 0.01$ , \*\*\*  $p < 0.001$ , \*\*\*\*  $p < 0.0001$ )

|                         | Performance     |                   | Strategy          |                 |
|-------------------------|-----------------|-------------------|-------------------|-----------------|
| Variability<br>Feedback | <i>LV</i>       | <i>HV</i>         | <i>LV</i>         | <i>HV</i>       |
| <i>Kp</i>               | 0.677±0.006     | 0.796±0.006       | 14.847±0.977      | 10.038±0.882    |
| <i>Kr</i>               | 0.658±0.006     | 0.784±0.006       | 10.052±0.959      | 11.808±1.137    |
| <i>KpKr</i>             | 0.652±0.005     | 0.746±0.008       | 11.898±1.283      | 10.651±1.563    |
| <i>Kp ↔ Kr</i>          | 0.019±0.0011(*) | 0.012±0.001(ns)   | 4.795±0.093(****) | 1.771±0.090(ns) |
| <i>Kr ↔ KpKr</i>        | 0.028±0.001(ns) | 0.048±0.001(****) | 2.502±0.130(ns)   | 1.389±0.165(ns) |
| <i>Kp ↔ KpKr</i>        | 0.011±0.001(**) | 0.038±0.002(****) | 2.324±0.152(ns)   | 0.063±0.184(ns) |
