# Supplementary material for: Simulated operant reflex conditioning environment reveals effects of feedback parameters
Source: PubMed Central journal article supplement (PMC10956789; doi:10.1371/journal.pone.0300338), 2024-03-21
Supplement: pone.0300338.s002.pdf [file pone.0300338.s002.pdf]

**S2 Table. Effect of biological variability and reward threshold on performance and operant strategy.** Values represent overall mean  $\pm$  SE. Tukey HSD was used for pair-wise comparisons ( $\leftrightarrow$ ) between conditions of high and low variability (*HV*, *LV*) and difficult, moderate, and easy threshold (*DT*, *MT*, *ET*).

Statistical significance (\*  $p < 0.05$ , \*\* $p < 0.01$ , \*\*\* $p < 0.001$ , \*\*\*\* $p < 0.0001$ )

|                                       | Performance             |                       | Strategy                 |                       |
|---------------------------------------|-------------------------|-----------------------|--------------------------|-----------------------|
| Variability<br>Feedback               | <i>LV</i>               | <i>HV</i>             | <i>LV</i>                | <i>HV</i>             |
| <i>LT</i>                             | 0.661 $\pm$ 0.004       | 0.784 $\pm$ 0.007     | 18.753 $\pm$ 1.297       | 13.378 $\pm$ 1.166    |
| <i>MT</i>                             | 0.658 $\pm$ 0.006       | 0.784 $\pm$ 0.006     | 10.052 $\pm$ 0.959       | 11.808 $\pm$ 1.137    |
| <i>HT</i>                             | 0.729 $\pm$ 0.005       | 0.797 $\pm$ 0.006     | 6.364 $\pm$ 1.317        | 8.252 $\pm$ 1.224     |
| <i>LT</i> $\leftrightarrow$ <i>MT</i> | 0.004 $\pm$ 0.001(ns)   | 0.002 $\pm$ 0.001(ns) | 8.905 $\pm$ 0.146(****)  | 1.656 $\pm$ 0.146(ns) |
| <i>MT</i> $\leftrightarrow$ <i>HT</i> | 0.069 $\pm$ 0.001(****) | 0.013 $\pm$ 0.001(ns) | 3.619 $\pm$ 0.194(**)    | 3.351 $\pm$ 0.177(*)  |
| <i>LT</i> $\leftrightarrow$ <i>HT</i> | 0.066 $\pm$ 0.009(****) | 0.015 $\pm$ 0.001(ns) | 12.476 $\pm$ 0.127(****) | 5.069 $\pm$ 0.085(**) |
